# Supplementary material for: Lineage-Specific Chimerism and Outcome After Hematopoietic Stem Cell Transplantation for DOCK8 Deficiency
Source: Springer Nature journal article supplement (doi:10.1007/s10875-021-01069-5), 2021-06-02

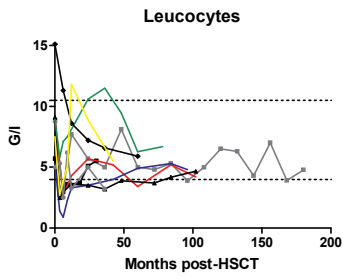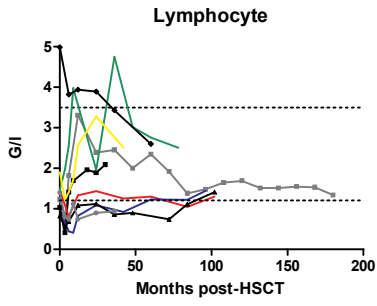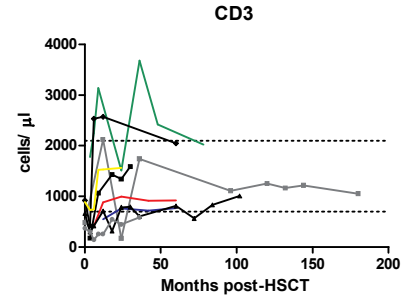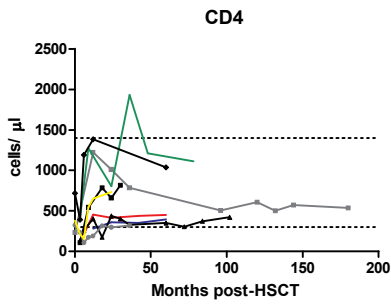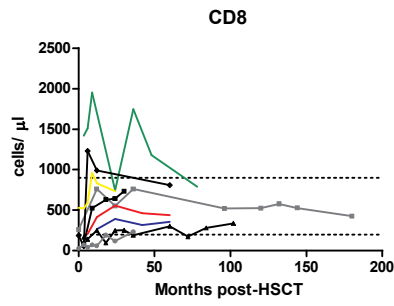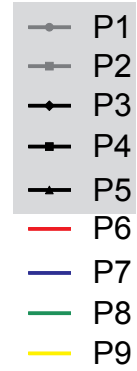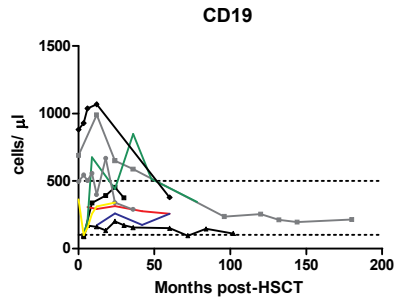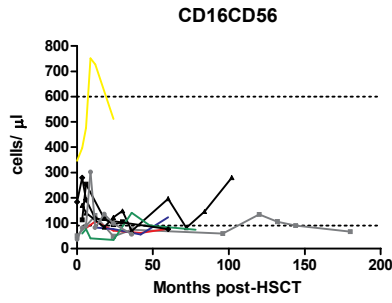

Supplement: MOESM1 [file 19221996]
